# Supplementary material for: Barriers to and facilitators of populational adherence to prevention and control measures of COVID-19 and other respiratory infectious diseases: a qualitative evidence synthesis
Source: PubMed Central journal article supplement — Eur Respir Rev. 2023 Jun 21;32(168):220238. doi: 10.1183/16000617.0238-2022 (PMC10282824; doi:10.1183/16000617.0238-2022), 2023-06-21
Supplement: ERR-0238-2022.SUPPLEMENT.pdf [file ERR-0238-2022.SUPPLEMENT.pdf]

## Supplementary – Search Strategy

### MEDLINE

Database: Ovid MEDLINE(R) ALL <1946 to Present>

Search Strategy:

---

- 1 exp Respiratory Tract Infections/
- 2 exp Coronavirus/
- 3 exp Coronavirus Infections/
- 4 exp Severe Acute Respiratory Syndrome/
- 5 exp Tuberculosis/
- 6 exp Middle East Respiratory Syndrome Coronavirus/
- 7 exp Influenza, Human/
- 8 (coronavirus\* or 2019 ncov or nCov or Covid 19 or Covid19 or SARS CoV 2 or novel coronavirus or novel corona virus or covid\* or pneumonia or severe acute respiratory syndrome or coronavirus 2 or coronavirus infection\* or coronavirus disease or corona virus disease or new coronavirus or new corona virus or new coronaviruses or novel coronaviruses or sars or sars corona virus or respiratory infectious disease\* or acute respiratory disease\* or middle east respiratory syndrome or MERS or tuberculosis or influenza or influenza like illness or pandemic\*).kf,tw.
- 9 1 or 2 or 3 or 4 or 5 or 6 or 7
- 10 8 or 9
- 11 exp Vaccines/
- 12 exp Social Distance/
- 13 exp Social Isolation/
- 14 exp Quarantine/
- 15 (social distance or social isolation or quarantine or physical distanc\* or lockdown or contact tracing or preventive measures).tw,kf.
- 16 exp Infection Control/
- 17 (aerosol or surface or environment or contaminat\* or spatial or aerodynamic or disinfectant or cross infection or infection prevent\* or infection control or viability or inactivation or indirect transmission or indirect virus transmission or indirect viral transmission or hand rub or hand rubbing or hand rubs or alcohol or hand hygiene or ethanol or hand disinfection).tw,kf.
- 18 exp Disease Transmission, Infectious/pc
- 19 exp Protective Devices/
- 20 (respiratory protective devices or mask\* or face mask\* or facemask\* or respiratory protection or eye protection or respiratory hygiene or clean\* or disinfect\* or respiratory hygiene or environmental control\*).tw,kf.
- 21 ((Droplet\* or contact or isolation) adj3 precaution\*).mp.
- 22 (control adj3 measure\*).tw,kf.
- 23 ((infectio\* adj3 battl\*) or (infectio\* adj3 control\*) or (infectio\* adj3 fight\*)).tw,kf.
- 24 or/11-23
- 25 ("adhere to" or adherence or barrier\* or challeng\* or compliance or comply\$ or facilitat\*).tw,kf.
- 26 animals/ not (humans/ and animals/)
- 27 10 and 24 and 25
- 28 27 not 26
- 29 exp Qualitative Research/

- 30 (qualitative adj (research or stud\$3)).ti,ab,kf.
- 31 (mixed adj (method\* or studies)).ti,ab,kf.
- 32 "Surveys and Questionnaires"/
- 33 exp Interviews as Topic/
- 34 interview\*.ti,ab,kf.
- 35 focus groups/
- 36 focus group\*.ti,ab,kf.
- 37 self report/
- 38 ((action or participatory) and research).ti,ab,kf.
- 39 exp Community-Based Participatory Research/
- 40 grounded theory/
- 41 grounded theory.ti,ab,kf.
- 42 phenomenolog\*.ti,ab,kf.
- 43 exp Narration/
- 44 narrat\*.ti,ab,kf.
- 45 conversation\*.ti,ab,kf.
- 46 discourse\*.ti,ab,kf.
- 47 (ethnograph\* or ethnomethodolog\* or ethno methodolog\* or autoethnograph\*).ti,ab,kf.
- 48 hermeneutic\*.ti,ab,kf.
- 49 constructivis\*.ti,ab,kf.
- 50 ((case or field) adj (study or studies)).ti,ab,kf.
- 51 ((participant\* or field) adj observ\*).ti,ab,kf.
- 52 ((purpos\* or theoretical or judg?ment or "maximum variation" or convenience or "critical case" or "deviant case" or "key informant" or snowball or cluster) adj sampl\*).ti,ab,kf.
- 53 (experience\* or perspective\* or perception\* or meaning\* or view? or viewpoint\*).ti.
- 54 ((lived or life or personal\* or patient? or survivor\*) adj3 (experience\* or perspective\* or perception\* or meaning\* or view? or viewpoint\*)).ti,ab,kf.
- 55 ((thematic or content) adj analys\*).ti,ab,kf.
- 56 "group discussion\*".ti,ab,kf.
- 57 (cope or copes or coping or thrive or thrives or thriving).ti,ab,kf.
- 58 finding?.ti,ab,kf.
- 59 or/29-58
- 60 28 and 59

\*\*\*\*\*

## **EMBASE**

Database: Embase <1996 to Present>

Search Strategy:

- 
- 1 exp Respiratory Tract Infections/
  - 2 exp Coronavirus/
  - 3 exp Coronavirus Infections/
  - 4 exp Severe Acute Respiratory Syndrome/
  - 5 exp Tuberculosis/
  - 6 exp Middle East Respiratory Syndrome Coronavirus/
  - 7 exp Influenza, Human/
  - 8 (coronavirus\* or 2019 ncov or nCov or Covid 19 or Covid19 or SARS CoV 2 or novel coronavirus or novel corona virus or covid\* or pneumonia or severe acute respiratory

syndrome or coronavirus 2 or coronavirus infection\* or coronavirus disease or corona virus disease or new coronavirus or new corona virus or new coronaviruses or novel coronaviruses or sars or sars corona virus or respiratory infectious disease\* or acute respiratory disease\* or middle east respiratory syndrome or MERS or tuberculosis or influenza or influenza like illness or pandemic\*).ti,ab.

9 1 or 2 or 3 or 4 or 5 or 6 or 7

10 8 or 9

11 exp Vaccines/

12 exp Social Distance/

13 exp Social Isolation/

14 exp Quarantine/

15 (social distance or social isolation or quarantine or physical distanc\* or lockdown or contact tracing or preventive measures).ti,ab.

16 exp Infection Control/

17 (aerosol or surface or environment or contaminat\* or spatial or aerodynamic or disinfectant or cross infection or infection prevent\* or infection control or viability or inactivation or indirect transmission or indirect virus transmission or indirect viral transmission or hand rub or hand rubbing or hand rubs or alcohol or hand hygiene or ethanol or hand disinfection).ti,ab.

18 exp Disease Transmission, Infectious/pc

19 exp Protective Devices/

20 (respiratory protective devices or mask\* or face mask\* or facemask\* or respiratory protection or eye protection or respiratory hygiene or clean\* or disinfect\* or respiratory hygiene or environmental control\*).ti,ab.

21 ((Droplet\* or contact or isolation) adj3 precaution\*).mp.

22 (control adj3 measure\*).ti,ab.

23 ((infectio\* adj3 battl\*) or (infectio\* adj3 control\*) or (infectio\* adj3 fight\*)).ti,ab.

24 or/11-23

25 ("adhere to" or adherence or barrier\* or challeng\* or compliance or comply\$ or facilitat\*).ti,ab.

26 10 and 24 and 25

27 animals/ not (humans/ and animals/)

28 26 not 27

29 exp Qualitative Research/

30 (qualitative adj (research or stud\$3)).ti,ab,kw.

31 (mixed adj (method\* or studies)).ti,ab,kw.

32 "Surveys and Questionnaires"/

33 exp Interviews as Topic/

34 interview\*.ti,ab,kw.

35 focus groups/

36 focus group\*.ti,ab,kw.

37 self report/

38 ((action or participatory) and research).ti,ab,kw.

39 exp Community-Based Participatory Research/

40 grounded theory/

41 grounded theory.ti,ab,kw.

42 phenomenolog\*.ti,ab,kw.

43 exp Narration/

44 narrat\*.ti,ab,kw.

45 conversation\*.ti,ab,kw.

- 46 discourse\*.ti,ab,kw.
- 47 (ethnograph\* or ethnomethodolog\* or ethno methodolog\* or autoethnograph\*).ti,ab,kw.
- 48 hermeneutic\*.ti,ab,kw.
- 49 constructivis\*.ti,ab,kw.
- 50 ((case or field) adj (study or studies)).ti,ab,kw.
- 51 ((participant\* or field) adj observ\*).ti,ab,kw.
- 52 ((purpos\* or theoretical or judg?ment or "maximum variation" or convenience or "critical case" or "deviant case" or "key informant" or snowball or cluster) adj sampl\*).ti,ab,kw.
- 53 (experience\* or perspective\* or perception\* or meaning\* or view? or viewpoint\*).ti.
- 54 ((lived or life or personal\* or patient? or survivor\*) adj3 (experience\* or perspective\* or perception\* or meaning\* or view? or viewpoint\*)).ti,ab,kw.
- 55 ((thematic or content) adj analys\*).ti,ab,kw.
- 56 "group discussion\*".ti,ab,kw.
- 57 (cope or copes or coping or thrive or thrives or thriving).ti,ab,kw.
- 58 finding?.ti,ab,kw.
- 59 or/29-58
- 60 28 and 59

\*\*\*\*\*

## **PYSCINFO**

Database: APA PsycInfo <1806 to Present>

Search Strategy:

- 
- 1 exp Respiratory Tract Disorders/
  - 2 exp Coronavirus/
  - 3 exp Severe Acute Respiratory Syndrome/
  - 4 exp Tuberculosis/ or exp Pulmonary Tuberculosis/
  - 5 exp influenza/
  - 6 (coronavirus\* or 2019 ncov or nCov or Covid 19 or Covid19 or SARS CoV 2 or novel coronavirus or novel corona virus or covid\* or pneumonia or severe acute respiratory syndrome or coronavirus 2 or coronavirus infection\* or coronavirus disease or corona virus disease or new coronavirus or new corona virus or new coronaviruses or novel coronaviruses or sars or sars corona virus or respiratory infectious disease\* or acute respiratory disease\* or middle east respiratory syndrome or MERS or tuberculosis or influenza or influenza like illness or pandemic\*).ti,ab.
  - 7 exp Immunization/
  - 8 exp Social Isolation/
  - 9 exp Quarantine/
  - 10 (social distance or social isolation or quarantine or physical distanc\* or lockdown or contact tracing or preventive measures).ti,ab.
  - 11 Infection Control.mp.
  - 12 (aerosol or surface or environment or contaminat\* or spatial or aerodynamic or disinfectant or cross infection or infection prevent\* or infection control or viability or inactivation or indirect transmission or indirect virus transmission or indirect viral transmission or hand rub or hand rubbing or hand rubs or alcohol or hand hygiene or ethanol or hand disinfection).ti,ab.
  - 13 disease transmission/ or coronavirus/ or infectious disorders/

- 14 Protective Devices.mp.
- 15 (respiratory protective devices or mask\* or face mask\* or facemask\* or respiratory protection or eye protection or respiratory hygiene or clean\* or disinfect\* or respiratory hygiene or environmental control\*).ti,ab.
- 16 ((Droplet\* or contact or isolation) adj3 precaution\*).mp.
- 17 (control adj3 measure\*).ti,ab.
- 18 ((infectio\* adj3 battl\*) or (infectio\* adj3 control\*) or (infectio\* adj3 fight\*)).ti,ab.
- 19 ("adhere to" or adherence or barrier\* or challeng\* or compliance or comply\$ or facilitat\*).ti,ab.
- 20 animals/ not (humans/ and animals/)
- 21 1 or 2 or 3 or 4 or 5 or 6
- 22 7 or 8 or 9 or 10 or 11 or 12 or 13 or 14 or 15 or 16 or 17 or 18
- 23 19 and 21 and 22
- 24 23 not 20
- 25 exp Qualitative Research/
- 26 (qualitative adj (research or stud\$3)).ti,ab.
- 27 (mixed adj (method\* or studies)).ti,ab.
- 28 (Surveys and Questionnaires).mp. [mp=title, abstract, heading word, table of contents, key concepts, original title, tests & measures, mesh]
- 29 interview\*.ti,ab.
- 30 exp Focus Group/
- 31 focus group\*.ti,ab.
- 32 exp Self-Report/
- 33 ((action or participatory) and research).ti,ab.
- 34 exp Grounded Theory/
- 35 grounded theory.ti,ab.
- 36 phenomenolog\*.ti,ab.
- 37 exp Narratives/
- 38 narrat\*.ti,ab.
- 39 conversation\*.ti,ab.
- 40 discourse\*.ti,ab.
- 41 (ethnograph\* or ethnomethodolog\* or ethno methodolog\* or autoethnograph\*).ti,ab.
- 42 hermeneutic\*.ti,ab.
- 43 constructivis\*.ti,ab.
- 44 ((case or field) adj (study or studies)).ti,ab.
- 45 ((participant\* or field) adj observ\*).ti,ab.
- 46 ((purpos\* or theoretical or judg?ment or "maximum variation" or convenience or "critical case" or "deviant case" or "key informant" or snowball or cluster) adj sampl\*).ti,ab.
- 47 (experience\* or perspective\* or perception\* or meaning\* or view? or viewpoint\*).ti.
- 48 ((lived or life or personal\* or patient? or survivor\*) adj3 (experience\* or perspective\* or perception\* or meaning\* or view? or viewpoint\*)).ti,ab.
- 49 ((thematic or content) adj analys\*).ti,ab.
- 50 "group discussion\*".ti,ab.
- 51 (cope or copes or coping or thrive or thrives or thriving).ti,ab.
- 52 finding?.ti,ab.
- 53 or/25-52
- 54 24 and 53

\*\*\*\*\*
